# Supplementary material for: Quantum dot-sensitized O-linked heptazine polymer photocatalyst for the metal-free visible light hydrogen generation
Source: Royal Society of Chemistry journal article supplement (doi:10.1039/d0ra03773g), 2020-01-01
Supplement: d0ra03773g1.pdf [file d0ra03773g1.pdf]

**Quantum dot sensitized O-linked heptazine polymer photocatalyst for metal-free visible  
light hydrogen generation**

*Soumadri Samanta, Sunil Kumar, V. R. Battula, Arpna Jaryal, Neha Sardana<sup>‡</sup> and  
Kamalakaran Kailasam\**

Advanced Functional Nanomaterials, Energy and Environment Unit, Institute of Nano Science  
and Technology (INST), Phase X, SAS Nagar, Mohali 160062, Punjab, India

<sup>‡</sup>*Current address:* Assistant Professor, Metallurgical and Materials Engineering, Room 316, Satish Dhawan  
Block, Indian Institute of Technology Ropar, Ropar, Punjab, India

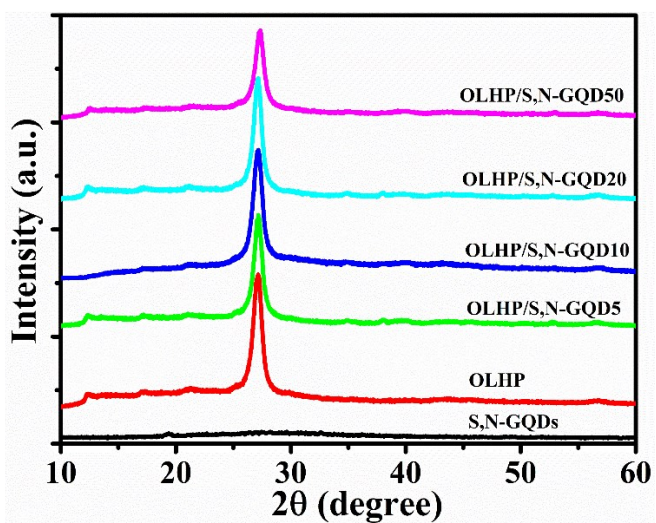

Figure S1. Powder XRD patterns of OLHP and OLHP/S,N-GQDs.

Table S1. Investigation of presence of S,N-GQDs by measuring normalized weight and atomic % of S through elemental analysis.

| Photocatalyst  | Normalized wt % of<br>S | Normalized atomic %<br>of S |
|----------------|-------------------------|-----------------------------|
| OLHP           | 0                       | 0                           |
| OLHP/S,N-GQD5  | 0.92                    | 0.38                        |
| OLHP/S,N-GQD10 | 1.72                    | 0.71                        |
| OLHP/S,N-GQD20 | 4.03                    | 1.66                        |
| OLHP/S,N-GQD50 | 8.16                    | 3.43                        |

Table S2. The type of bonding, binding energy (eV) and full width at half maximum (FWHM) of XPS peaks.

| Type of bonding | Binding energy (eV) | FWHM |
|-----------------|---------------------|------|
| S 2p            | 164.2               | 1.43 |
| C-C             | 284.5               | 0.81 |
| N-(C)3          | 288.2               | 0.66 |
| N-C=N           | 286.6               | 0.95 |
| C-O             | 532.3               | 1.15 |
| C=O             | 531.4               | 1.03 |
| C-N=C           | 398.5               | 0.55 |
| N-(C)3          | 399.4               | 1.22 |
| C-N-H           | 400.9               | 0.76 |
| N-Oxide         | 404.3               | 0.93 |

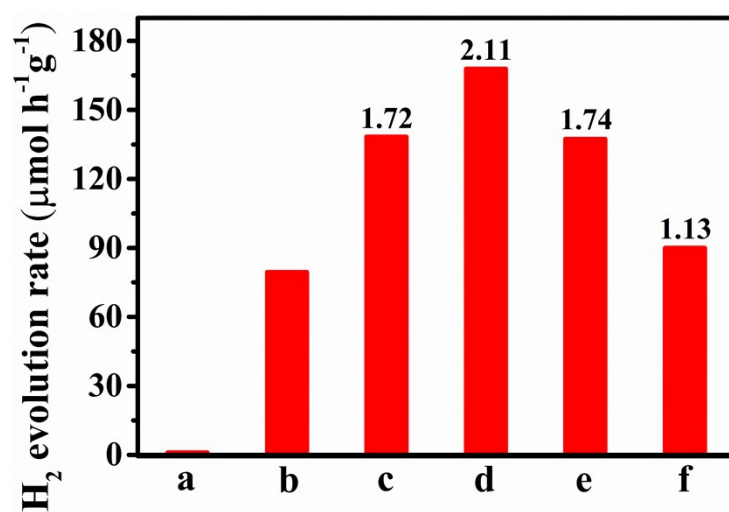

Figure S2. Comparison of HER with 2 wt% Pt as co-catalyst of (a) S,N-GQDs, (b) OLHP, (c) OLHP/S,N-GQD5, (d) OLHP/S,N-GQD10 (e) OLHP/S,N-GQD20 and (f) OLHP/S,N-GQD50.

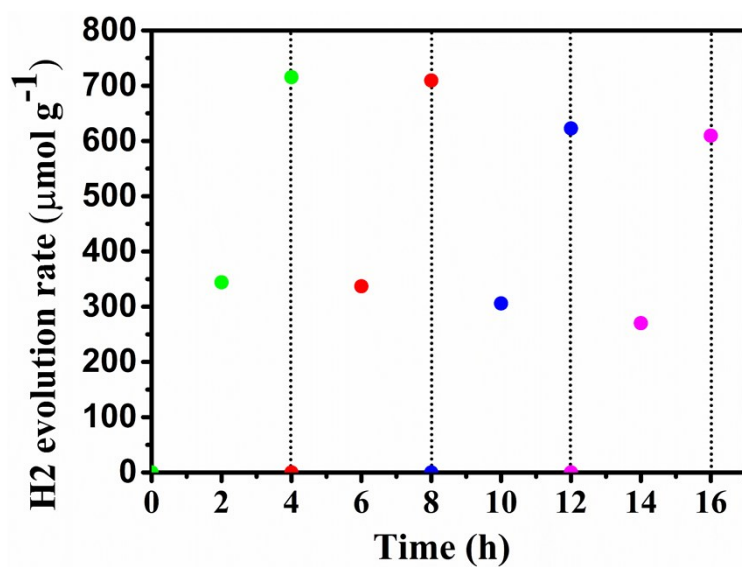

Figure S3. Stability cycle of H<sub>2</sub> evolution with 2 wt% Pt as co-catalyst of OLHP/S,N-GQD10.

We have carried out the photocatalytic experiment with varying ratio of H<sub>2</sub>O and TEOA for the photocatalyst OLHP/S,N-GQD10 with 2 wt% platinum as co-catalyst. We haven't detected hydrogen without the sacrificial agent. The results shows that with 1:1 ratio of H<sub>2</sub>O and TEOA, hydrogen evolution drop to 46  $\mu\text{mol h}^{-1} \text{g}^{-1}$ . Using 100% TEOA for the photocatalysis we got 13  $\mu\text{mol h}^{-1} \text{g}^{-1}$  of hydrogen evolution rate, which is very less compared to 167.8  $\mu\text{mol g}^{-1} \text{h}^{-1}$  for the 9:1 ratio of H<sub>2</sub>O and TEOA. So, we can conclude that majority of H<sub>2</sub> production coming from water splitting.

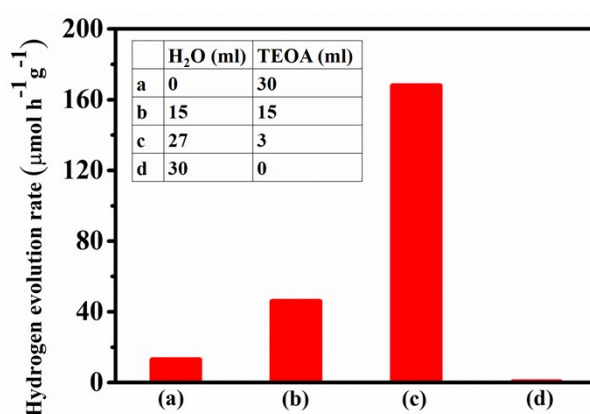

Figure S4. Hydrogen evolution rate for different ration of H<sub>2</sub>O and TEOA.
